# Supplementary material
Source: bioRxiv or medRxiv preprint supplement (https://medrxiv.org/highwire/filestream/82797/field_highwire_adjunct_files/0/2020.05.19.20106385-1.pdf)
Supplement: Supplementary file [file 2020.05.19.20106385-1.pdf]

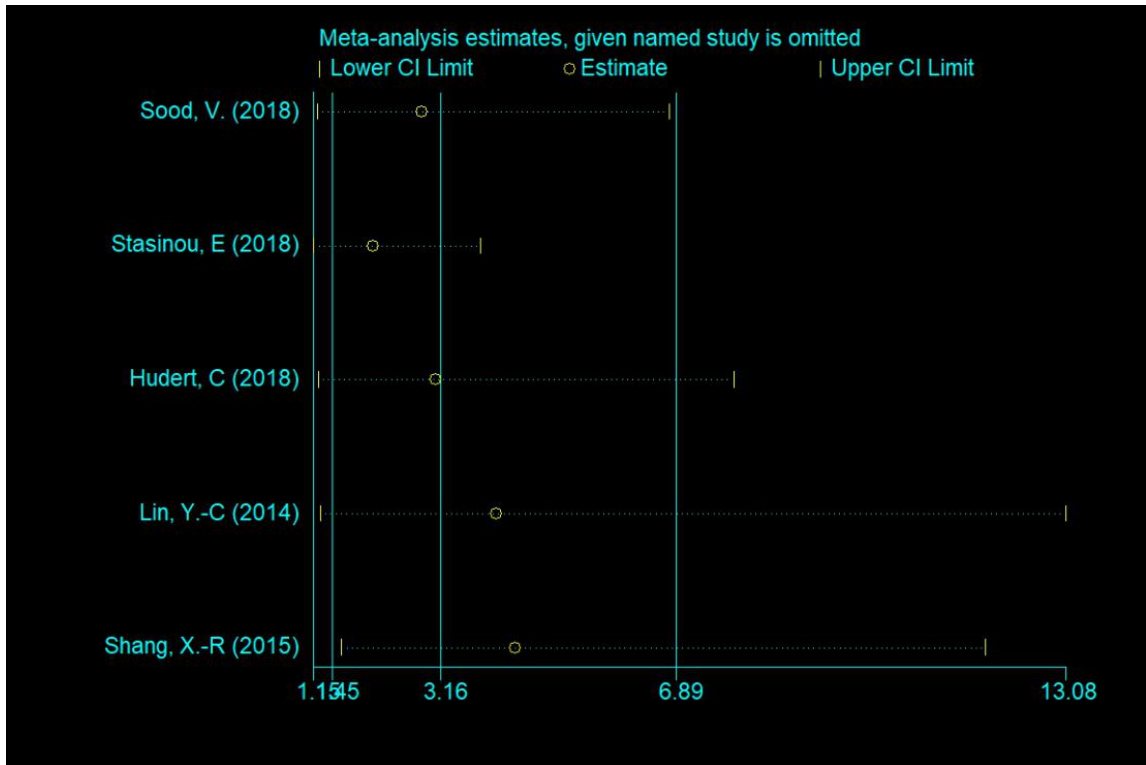

Supplementary Figure 1 Sensitivity analysis of the relationship between PNPLA3 rs738409 G/C and NADLD in children in the dominant model(GG+GC vs CC)

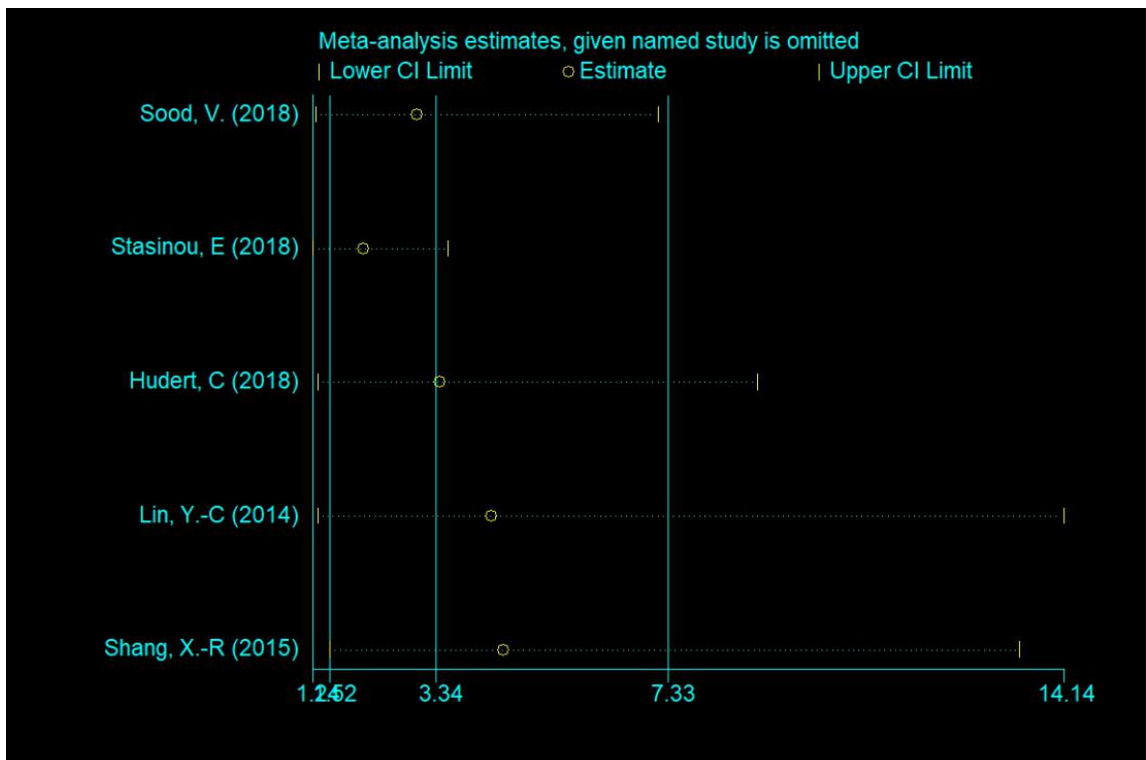

Supplementary Figure 2 Sensitivity analysis of the relationship between PNPLA3 rs738409 G/C and NAFLD in children in the allele model (G vs C)

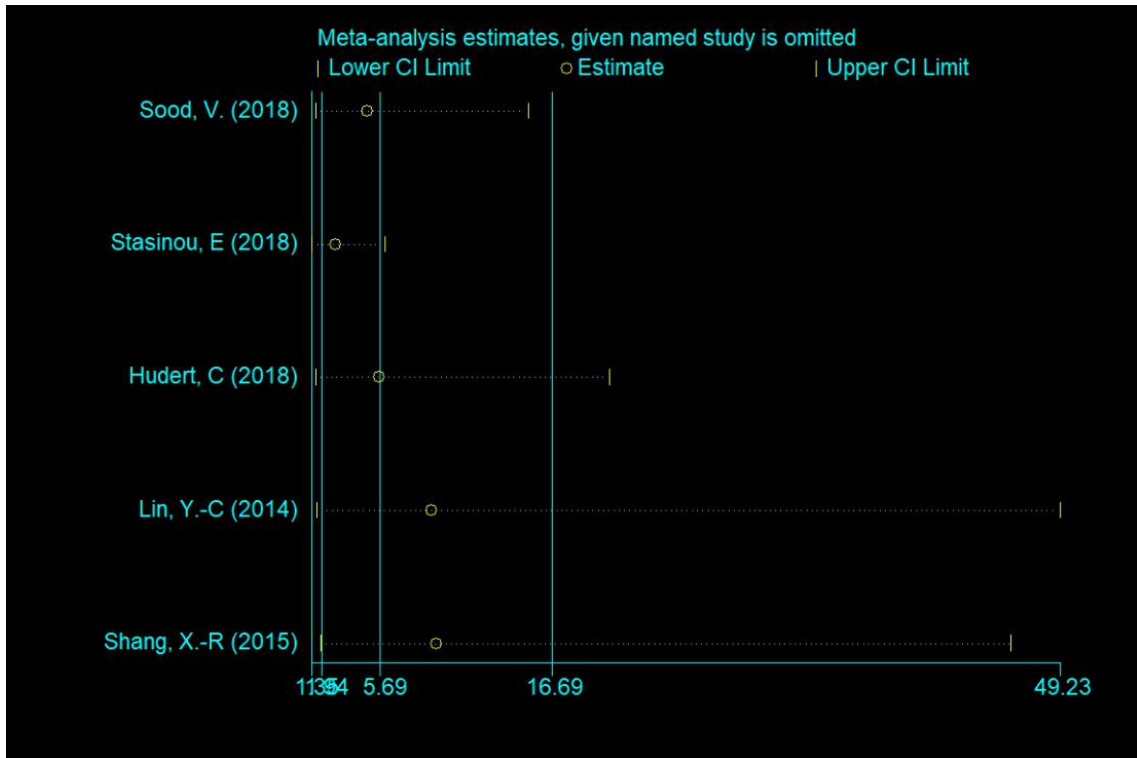

Supplementary Figure 3 Sensitivity analysis of the relationship between PNPLA3 rs738409 G/C and NAFLD in children in the recessive gene model (GG vs CG+CC)

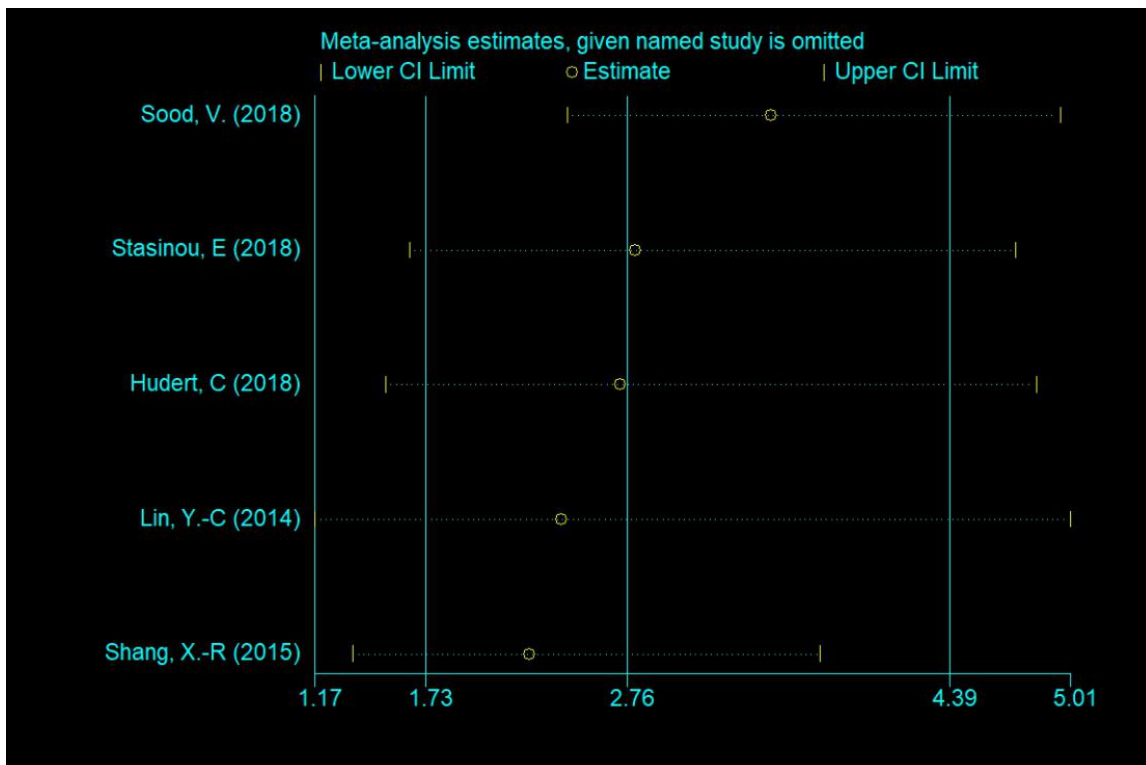

Supplementary Figure 4 Sensitivity analysis of the relationship between PNPLA3 rs738409 G/C and NAFLD in children in the superdominant model (GG+CC vs CC)

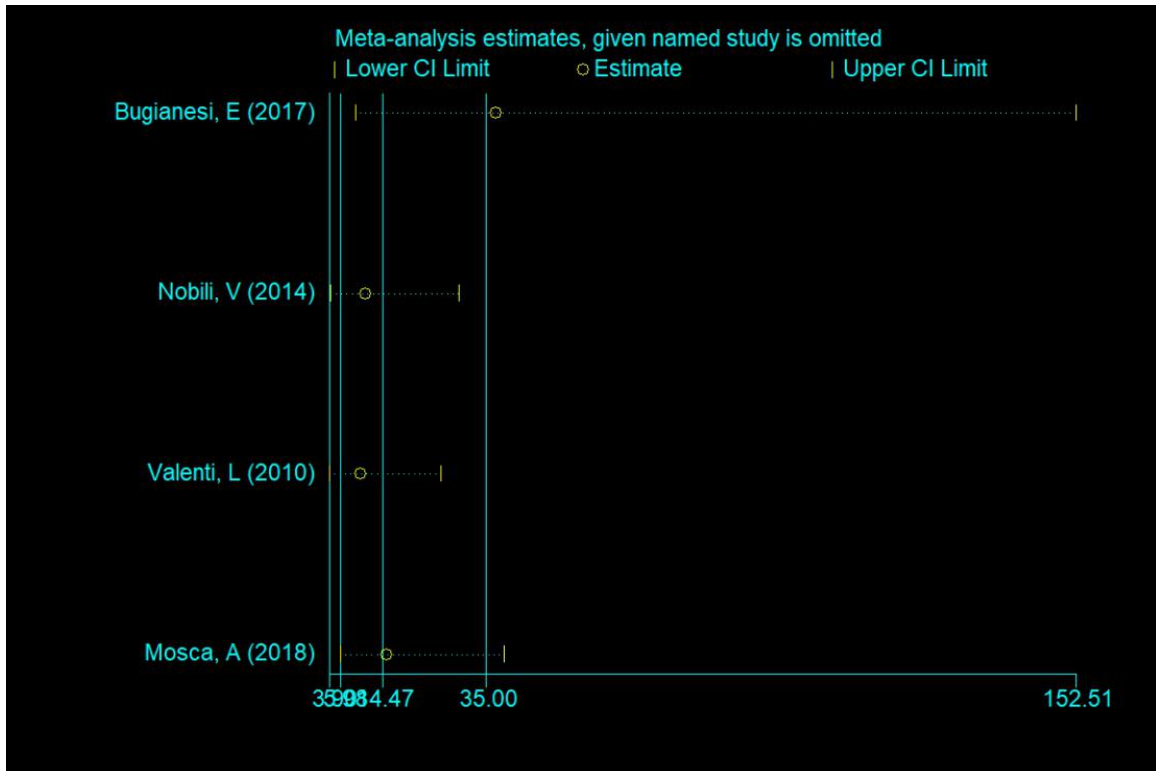

Supplementary Figure 5 Sensitivity analysis of the relationship between PNPLA3 rs738409 G/C and NASH in children in the recessive gene model (GG vs CG+CC)

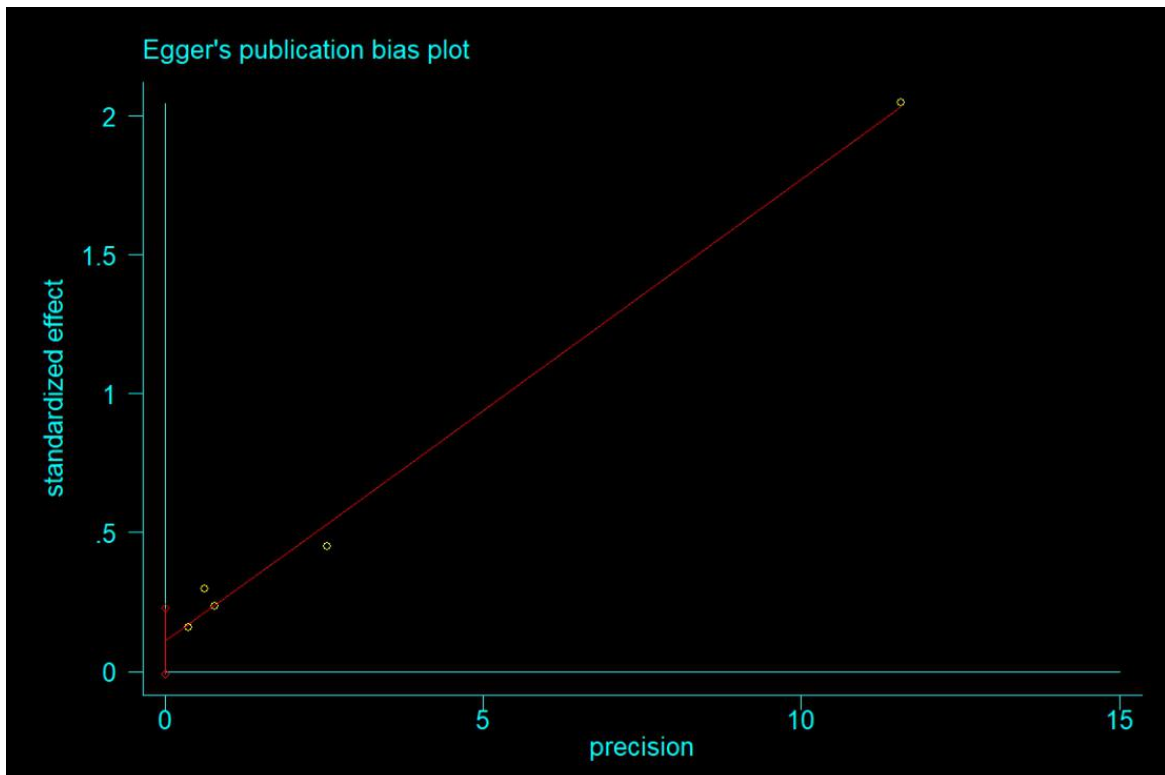

Supplementary Figure 6 Egger's funnel plot of the relationship between PNPLA3 rs738409 G/C and NADLD in children in the dominant model (GG+GC vs CC)

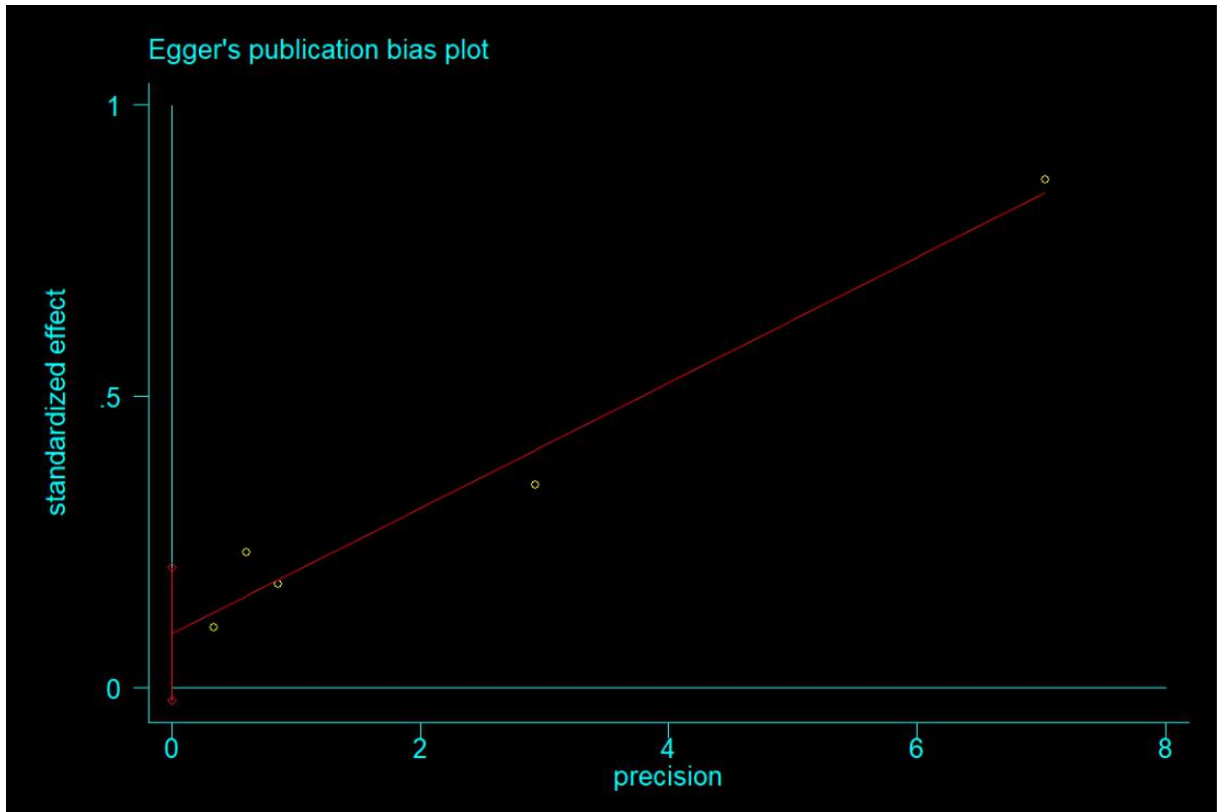

Supplementary Figure 7 Egger's funnel plot of the relationship between PNPLA3 rs738409 G/C and NAFLD in children in the allele model (G vs C)

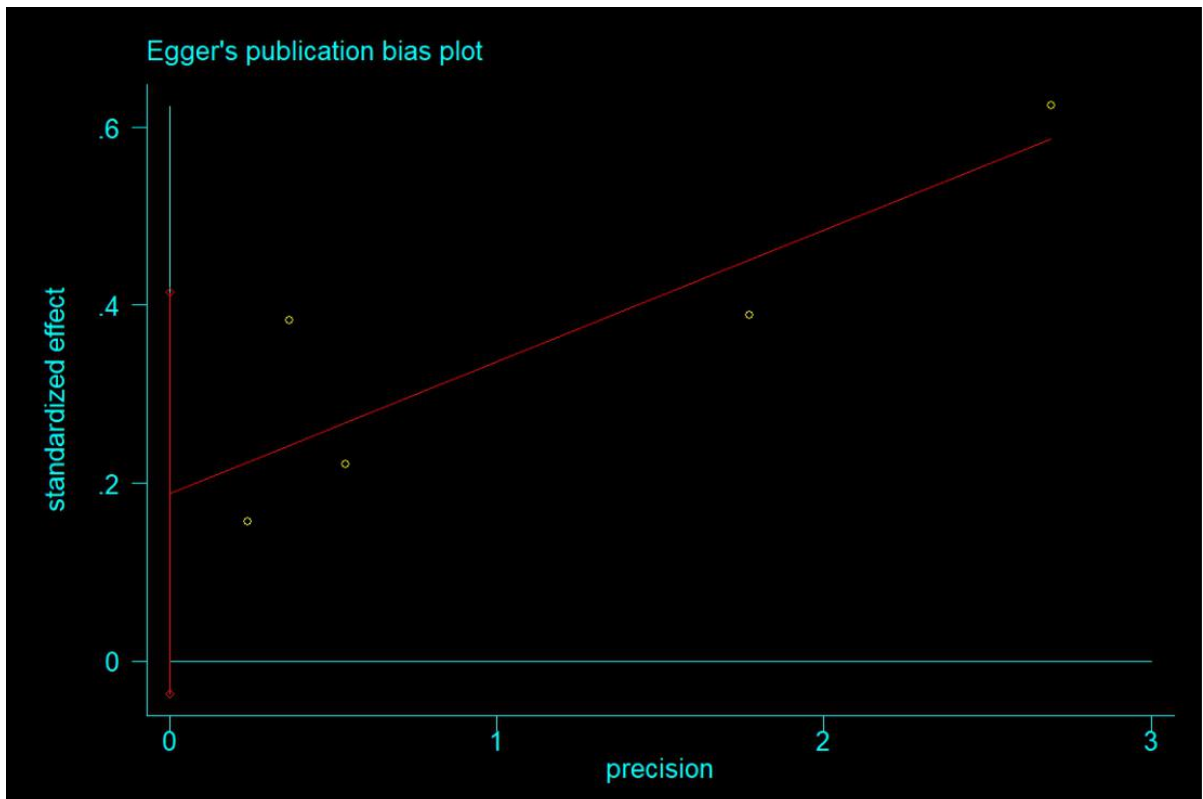

Supplementary Figure 8 Egger's funnel plot of the relationship between PNPLA3 rs738409 G/C and NAFLD in children in the recessive gene model (GG vs CG+CC)

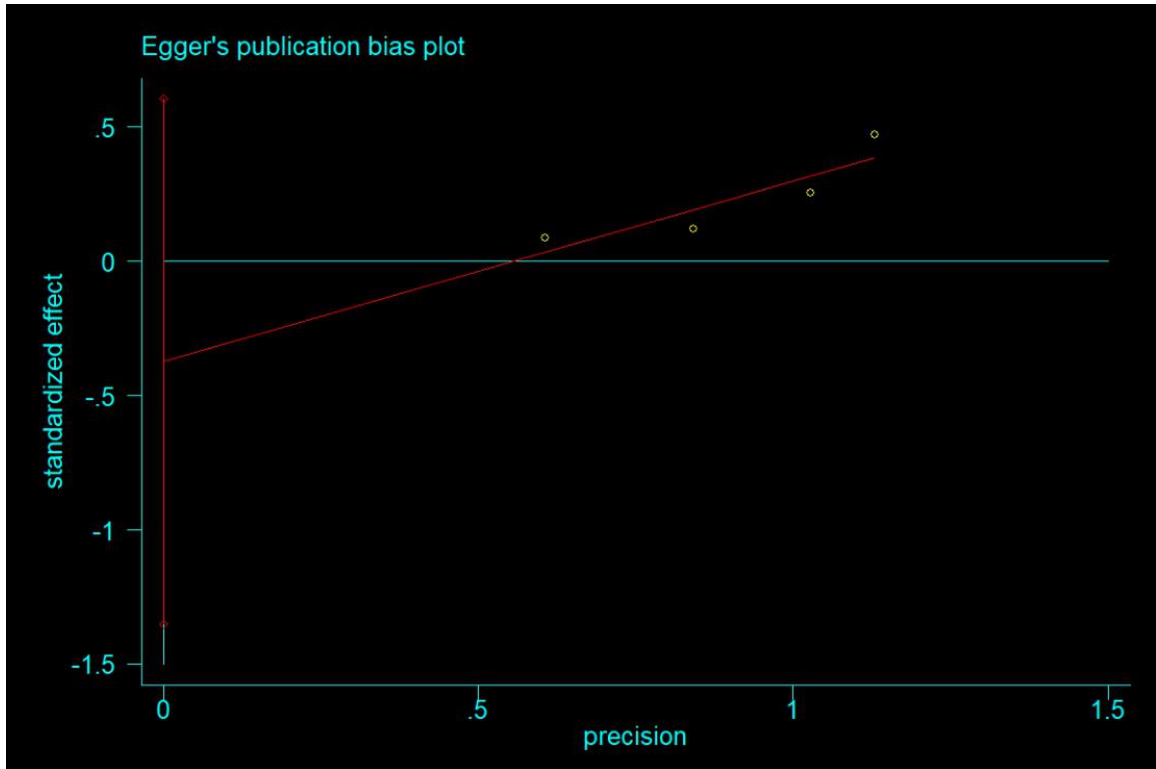

Supplementary Figure 9 Egger's funnel plot of the relationship between PNPLA3 rs738409 G/C and NAFLD in children in the superdominant model (GG+CC vs CC)

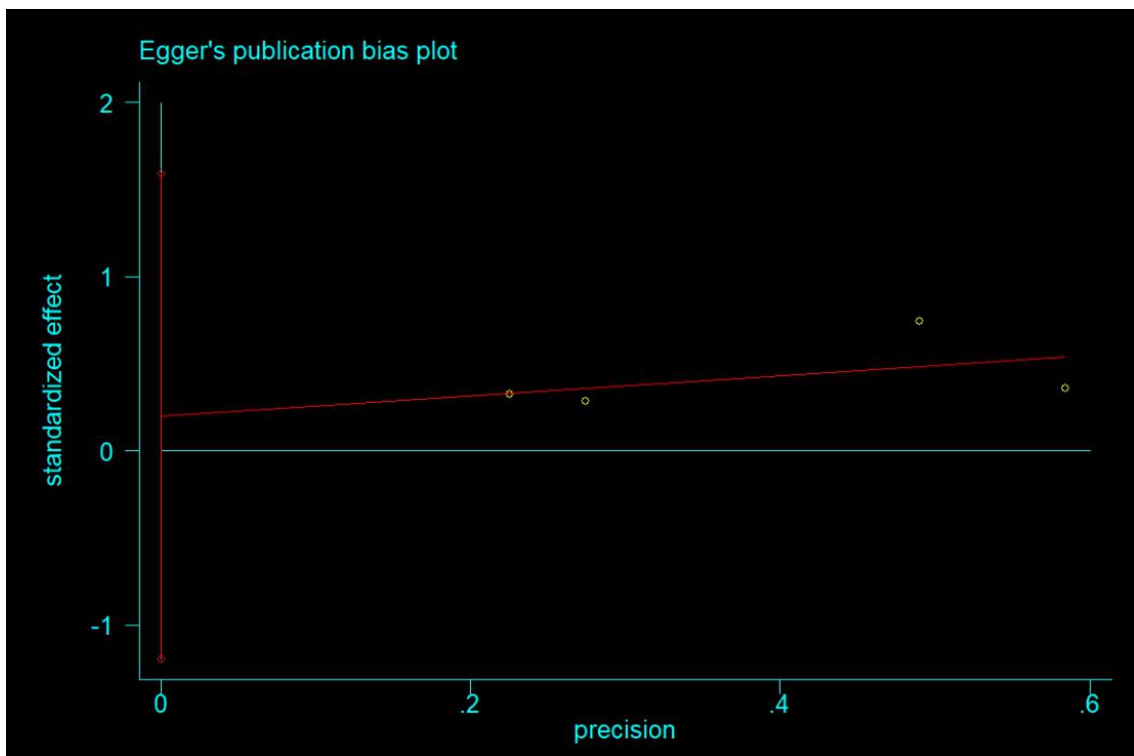

Supplementary Figure 10 Egger's funnel plot of the relationship between PNPLA3 rs738409 G/C and NASH in children in the recessive gene model (GG vs CG+CC)
